# Supplementary material for: Redox control on nitrogen isotope fractionation during planetary core formation
Source: PubMed Central journal article supplement — Proc Natl Acad Sci U S A. 2019 Jul 1;116(29):14485–94. doi: 10.1073/pnas.1820719116 (PMC6642344; doi:10.1073/pnas.1820719116), 2019-07-01
Supplement: pnas.1820719116.sapp.pdf [file pnas.1820719116.sapp.pdf]

## 1. Experimental and analytical procedure

### Starting compositions

We synthesized a series of Fe-rich haplo-basalt (HB) glasses based on the natural Adirondack-class Humphrey basalt from Gusev Crater, Mars (1) as well as a haplo-MORB (B14) and a haplo-andesite (A05) based on the compositions of Armstrong et al. (2) and Zhang et al. (3), respectively. We mixed pre-dried spectroscopically pure  $\text{SiO}_2$ ,  $\text{Al}_2\text{O}_3$ ,  $\text{MgO}$ ,  $\text{CaCO}_3$ ,  $\text{Na}_2\text{CO}_3$ , and  $\text{K}_2\text{CO}_3$  reagents. The mixtures were decarbonated by slow heating ( $3^\circ\text{C}/\text{min}$ ), then fused in air for 2 h at  $1400^\circ\text{C}$  in platinum crucibles in a 1 atm furnace. Melts were quenched to glass in water, then crushed and ground in PULVERISETTE agate jars to produce a fine 1–2  $\mu\text{m}$  powder. After decarbonation of the glass powder, Fe was added as  $\text{Fe}_2\text{O}_3$  powder. The Fe-bearing mixtures were then reduced in a Nabertherm furnace at  $900^\circ\text{C}$  and  $\log f_{\text{O}_2} = -14$  for 48 h. Finally, nitrogen was introduced as  $\text{Si}_3\text{N}_4$  powder to yield charges of 0.2 and 0.8 wt% N in the starting material. By varying the amount of  $\text{Si}_3\text{N}_4$  added to the starting compositions, we were able to change (but not control) the sample  $f_{\text{O}_2}$ , since  $\text{Si}_3\text{N}_4$  has a strong reducing effect (1).  $\text{Si}_3^{14}\text{N}_4$  was synthesized by Si nitridation using flowing  $\text{N}_2$  in a Nabertherm 1 atm furnace. Except for the haplo-MORB sample, starting mixes were spiked in  $^{15}\text{N}$  using  $\text{Si}_3^{15}\text{N}_4$  synthesized by Leonova et al. (4). The starting materials were loaded into graphite capsules, chosen to ensure reducing conditions and to provide a source of C in the experiments.

### Experimental procedure

Experiments were designed to equilibrate graphite-saturated basaltic melts with Fe-C-N alloys over a range of redox conditions ( $\Delta\text{IW} -0.5$  to  $\Delta\text{IW} -3$ ) to determine metal-silicate N fractionation. Experiments were performed in a 3/4-inch piston cylinder at 1 GPa and  $1400^\circ\text{C}$  for 6 h at the Laboratoire Magmas et Volcans (Clermont-Ferrand, France). Run temperature was controlled to within  $\sim 1^\circ\text{C}$  of the set point using W95Re5/W74Re26 thermocouples. Power output was monitored during the runs to ensure no temperature drift. Before decompression, the power to the furnace was cut and the experiment was quenched rapidly ( $\sim 50^\circ\text{C}/\text{s}$ ).

Samples were mounted in epoxy resin and polished individually to limit  $^{15}\text{N}$  contamination between samples. They were then removed from the resin and pressed into high-purity indium metal mounts (as recommended for water analysis) and carbon coated for electron microprobe analysis. Raman analyses were performed before carbon coating to avoid interference from carbon vibrational bands.

### Electron probe microanalysis (EPMA)

Major element compositions were analyzed with a CAMECA SX5 at CAMPARIS Centre at Sorbonne Université (Paris, France). For silicate glass analyses, we used an accelerating voltage of 10 kV and a 10 nA beam defocused to 10  $\mu\text{m}$ . Diopside glass (Si, Ca, Mg),

43 orthoclase (Al, K), albite (Na), and pure Fe were used as standards. For metal alloys, we used  
 44 a 10 kV accelerating voltage and a focused 40 nA beam. Pure Fe and Pt were used as metal  
 45 standards. The major element compositions of silicate glasses are presented in Table S1, and  
 46 those of metal alloys in Table S2.

47  
 48 **Table S1.** Major element compositions (wt%) of glasses determined by EPMA.

| Sample | $n_{\text{EPMA}}$ | SiO <sub>2</sub> | Al <sub>2</sub> O <sub>3</sub> | MgO        | CaO         | K <sub>2</sub> O | FeO        | Na <sub>2</sub> O | Total       |
|--------|-------------------|------------------|--------------------------------|------------|-------------|------------------|------------|-------------------|-------------|
| HB01   | 7                 | 68.7 ± 0.3       | 8.3 ± 0.4                      | 8.2 ± 0.5  | 2.4 ± 0.2   | 0.53 ± 0.06      | 1.6 ± 0.2  | 5.3 ± 0.2         | 95.0 ± 1.2  |
| HB05   | 4                 | 46.4 ± 0.2       | 9.1 ± 0.2                      | 10.0 ± 0.3 | 6.1 ± 0.1   | 0.74 ± 0.03      | 22.1 ± 0.6 | 3.7 ± 0.2         | 98.2 ± 1.0  |
| HB15   | 7                 | 61.4 ± 0.4       | 6.7 ± 0.1                      | 8.0 ± 0.3  | 3.2 ± 0.1   | 0.27 ± 0.02      | 10.5 ± 0.4 | 5.9 ± 0.3         | 96.0 ± 1.8  |
| HB3    | 8                 | 64.8 ± 1.0       | 3.8 ± 0.2                      | 9.5 ± 0.7  | 1.84 ± 0.07 | 0.35 ± 0.08      | 6.9 ± 0.4  | 3.9 ± 0.9         | 91.1 ± 0.9* |
| HB4    | 10                | 60.3 ± 0.9       | 5.5 ± 0.3                      | 6.9 ± 0.3  | 3.1 ± 0.1   | 0.39 ± 0.03      | 9.2 ± 0.3  | 4.7 ± 1.0         | 90.2 ± 0.7* |
| A05    | 7                 | 66.7 ± 1.1       | 13.7 ± 0.7                     | 2.0 ± 0.1  | 5.9 ± 0.2   | 1.4 ± 0.1        | 4.6 ± 0.3  | 5.4 ± 0.4         | 99.7 ± 0.6  |
| B14    | 9                 | 52.4 ± 0.9       | 15.7 ± 0.2                     | 9.2 ± 0.3  | 11.5 ± 0.1  | 0.06 ± 0.03      | 7.5 ± 0.6  | 2.2 ± 0.2         | 98.5 ± 1.0  |

49 \*Low totals may be due to graphite microinclusions in the samples.

50  $n_{\text{EPMA}}$  indicates the number of EPMA analyses on each sample.

51 Reported uncertainties are 1 $\sigma$  standard deviations.

52  
 53 **Table S2.** Fe and Pt contents of metal alloys determined by EPMA, and their N and C contents  
 54 determined by SIMS.

| Sample | $n_{\text{EPMA}}$ | Fe [wt%]   | Pt [wt%]    | $n_{\text{SIMS}}$ | C [wt%]       | N [ppm]     |
|--------|-------------------|------------|-------------|-------------------|---------------|-------------|
| HB01   | 5                 | 93.7 ± 0.7 | 0.07 ± 0.08 | 2                 | 0.110 ± 0.001 | 28 ± 3      |
| HB05   | 5                 | 93.6 ± 1.2 | 0.7 ± 0.4   | 4                 | 6.06 ± 0.01   | 1571 ± 1287 |
| HB15   | 2                 | 89.6 ± 0.1 | bdl         | 3                 | 2.66 ± 0.06   | 682 ± 267   |
| HB3    | 5                 | 92.2 ± 3.2 | 0.2 ± 0.4   | 4                 | 5.74 ± 0.01   | 1493 ± 149  |
| HB4    | 11                | 97.1 ± 1.5 | 0.1 ± 0.6   | 6                 | 5.73 ± 0.02   | 1488 ± 14   |
| A05    | 6                 | 93.4 ± 0.2 | 0.6 ± 0.8   | 3                 | 2.552 ± 0.001 | 669 ± 125   |
| B14    | 7                 | 94.6 ± 1.2 | bdl         | 3                 | 7.42 ± 0.01   | 1012 ± 20   |

55 bdl: below detection limit.

56  $n_{\text{EPMA}}$  and  $n_{\text{SIMS}}$  indicate the number of EPMA and SIMS analyses, respectively.

57 Reported uncertainties are 1 $\sigma$  standard deviations for Fe and Pt contents and 2 $\sigma$  standard deviations  
 58 for C and N contents.

## 60 Raman spectroscopy

61 For silicate glasses, Raman spectroscopy measurements were carried out using a LabRAM  
 62 HR microspectrometer (Horiba Jobin Yvon) at GeoRessources (Nancy, France) using the  
 63 457.9 nm radiations of an Ar<sup>+</sup> laser (Stabilite 2017, Spectra-Physics) with 100–155 mW  
 64 output. The laser intensity was reduced with neutral density filters to avoid thermal  
 65 degradation of the samples and focused to a ~2  $\mu\text{m}$  spot size with 8–23 mW on sample  
 66 through a 50 $\times$  long-working-distance Olympus objective with a 0.5 numerical aperture.  
 67 Scattered light was collected through a confocal aperture into a focal length of 800 mm. The  
 68 spectrometer was equipped with an 1800 grooves $\cdot\text{mm}^{-1}$  grating. Acquisition time was 10 s,  
 69 with 60 acquisitions collected per spectrum. Raman intensities were corrected from the  
 70 instrument response curve by calibration of the spectrometer toward a white lamp (5). To  
 71 observe molecular N<sub>2</sub> vibrations, spectra were acquired in the 2200–2400  $\text{cm}^{-1}$  spectral

72 window. C-H, N-H, and O-H vibrations were observed in the 2800–3700  $\text{cm}^{-1}$  spectral  
73 window.

74 For metal alloys, we used a LabRAM microspectrometer (Horiba Jobin Yvon) at  
75 GeoRessources. Sample excitation was accomplished using the 514.5 nm line of an Ar<sup>+</sup> laser  
76 with 100–155 mW output. To avoid melting the metal, the laser intensity was reduced with  
77 neutral density filters to between 9 and 15 mW. Measurements were performed using an 1800  
78 grooves·mm<sup>-1</sup> grating centered at 950  $\text{cm}^{-1}$ . Ten acquisitions of 10 s were collected.

79 Baseline corrections were performed using the IGOR software package (Wavemetrics  
80 Inc.). A linear baseline was used for the 2200–2400  $\text{cm}^{-1}$  part of the Raman signal of silicate  
81 glasses, whereas a spline correction was fitted for the 2800–3700  $\text{cm}^{-1}$  baseline of silicate  
82 glasses and the 200–900  $\text{cm}^{-1}$  part of the Raman signal in metal alloys.

83

#### 84 **Secondary ion mass spectrometry (SIMS)**

85 *In-situ* measurements of N concentrations and isotopic ratios were performed at the Centre de  
86 Recherches Pétrographiques et Géochimiques (CRPG, Nancy, France) using the CAMECA  
87 1280 HR2 and 1270 ion microprobes for silicate glasses and metal blobs, respectively.  
88 Sample mounts were coated with gold and left in the instrument airlock for at least 24 h to  
89 ensure thorough removal of any adsorbed water before introduction into the sample chamber,  
90 although any hydride species are well-resolved from the peaks of interest (6). Furthermore, to  
91 minimize any surface contamination, the surface of the glasses and metals were pre-sputtered  
92 for 180 s over an area of 10  $\mu\text{m} \times 10 \mu\text{m}$  prior to signal acquisition. For all abundance and  
93 isotopic analyses, the beam was rastered over an area of 5  $\mu\text{m} \times 5 \mu\text{m}$  (**Fig. S1**), and a  
94 dynamical transfer operating system was used to compensate the primary rastering by  
95 recentering the beam in the secondary optic of the ion probe. Prior to data acquisition, the  
96 secondary ion beam was automatically centered in  $x$  and  $y$  on the field aperture and the  
97 contrast aperture, followed by a mass-centering routine in order to compensate for any  
98 magnetic field drift.

99 Nitrogen isotopes in silicate glasses (Table S3) were measured on the CAMECA 1280  
100 HR2 ion microprobe by spot analyses of  $^{14}\text{N}^{16}\text{O}^-$  and  $^{15}\text{N}^{16}\text{O}^-$  molecular ions at masses 30 and  
101 31, respectively, at a nominal mass resolution  $m/\Delta m = 14,000$  using a 10 kV Cs<sup>+</sup> primary ion  
102 beam, a ~10 nA current, and a normal-incidence electron gun for charge compensation (6).  
103 The  $^{14}\text{N}^{16}\text{O}^-$  and  $^{15}\text{N}^{16}\text{O}^-$  ions were measured for 25 cycles in peak-jumping mode on an  
104 electron multiplier for 4 and 20 s, respectively, together with  $^{27}\text{Al}^-$  (4 s),  $^{30}\text{Si}^-$  (4 s), and  $^{16}\text{O}_2^-$   
105 (4 s) on a faraday cup. A suite of 12 reference glasses with known  $^{14}\text{N}$  contents (6) was used  
106 to determine the nitrogen concentration of the samples based on the  $^{14}\text{N}^{16}\text{O}^-$  count rate  
107 normalized by the  $^{16}\text{O}_2^-$  signal (**Fig. S2a**). Based on repeated isotope ratio measurements in 5  
108 out of the 12 reference glasses (with N content  $\geq 136$  ppm) with  $\delta^{15}\text{N} = -4 \pm 1\text{‰}$  (6), the  
109 instrumental mass fractionation (IMF) for glass analyses was determined to be  $\alpha_{\text{inst}} = 1.0259$   
110  $\pm 0.0074$  ( $2\sigma$ ). Thus, the measured  $^{15}\text{N}/^{14}\text{N}$  ratios of the experimental glasses were  
111 subsequently corrected for IMF according to  $(^{15}\text{N}/^{14}\text{N})_{\text{corr}} = (^{15}\text{N}/^{14}\text{N})_{\text{measured}} / \alpha_{\text{inst}}$ .

112

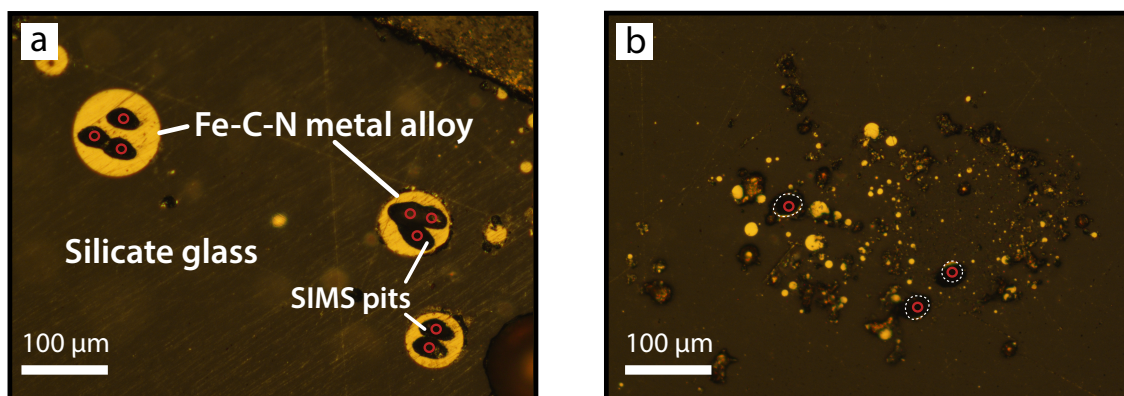

113  
 114 **Fig. S1.** Reflected-light microscope images of (a) sample HB3 and (b) sample A05 showing the  
 115 variable sizes of metal alloy blobs among different samples. Red circles (~5 μm) indicate the location  
 116 of ion probe spots for metal C-N measurements. The surrounding black spots are the area where the  
 117 gold coating was removed due to primary ion beam sputtering. The white dotted circles in (b)  
 118 represent the initial shapes of the metal blobs.  
 119

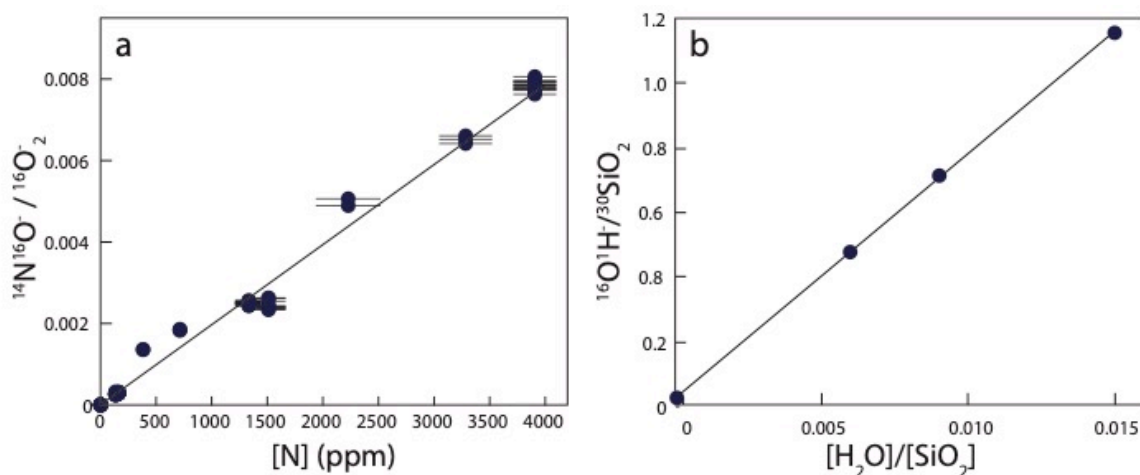

120  
 121 **Fig. S2.** Calibration lines for N and OH abundance analyses in silicate glasses. (a) The relationship  
 122 between the secondary ion intensity ratio  $^{14}\text{N}^{16}\text{O}^- / ^{16}\text{O}_2^-$  and the known  $^{14}\text{N}$  content of the reference  
 123 glasses ( $r^2 = 0.95$ ). (b) The measured and reference values of  $\text{H}_2\text{O}$  and  $\text{SiO}_2$  concentrations in the four  
 124 glass reference materials provide excellent consistency ( $r^2 = 0.99$ ).  
 125

126 Nitrogen and carbon concentrations, as well as  $^{15}\text{N}/^{14}\text{N}$  and  $^{13}\text{C}/^{12}\text{C}$ , in the metal blobs  
 127 were measured with the CAMECA 1270 ion microprobe using a 10 kV  $\text{Cs}^+$  primary ion  
 128 beam, a ~2.4 nA current, and a normal-incidence electron gun for charge compensation. The  
 129 size of the primary beam was set to ~5 μm to analyze metal blobs 10–65 μm in diameter (Fig.  
 130 S1). Nitrogen isotopes (Table S3) were measured as  $^{12}\text{C}^{14}\text{N}^-$  and  $^{12}\text{C}^{15}\text{N}^-$  at masses 26 and 27,  
 131 respectively, with a mass resolution of 8,000. Twelve cycles were collected for each analysis,  
 132 following the mass sequence  $^{12}\text{C}_2^-$  (8 s),  $^{12}\text{C}^{13}\text{C}^-$  (16 s),  $^{12}\text{C}^{14}\text{N}^-$  (8 s),  $^{13}\text{C}^{14}\text{N}^-$  (8 s),  $^{12}\text{C}^{15}\text{N}^-$  (8  
 133 s),  $^{28}\text{Si}^-$  (8 s), and  $^{56}\text{Fe}^-$  (8 s). With the exception of  $^{12}\text{C}^{13}\text{C}$ , signals were measured on a  
 134 faraday cup in most cases. For samples HB3 and HB4,  $^{13}\text{C}^{14}\text{N}$  was measured on the electron  
 135 multiplier. Because the metal blobs of sample HB01 contained only 28 ppm N,  $^{12}\text{C}^{14}\text{N}$ ,  
 136  $^{12}\text{C}^{15}\text{N}$ , and  $^{13}\text{C}^{14}\text{N}$  were measured on the electron multiplier. Carbon and nitrogen elemental  
 137 abundances were determined using the  $^{12}\text{C}$  signal and the  $^{12}\text{C}^{14}\text{N}/^{12}\text{C}$  ratio, respectively.

138 Carbon concentrations were calibrated using a set of four certified NBS stainless steel  
 139 reference materials (NBS661, NBS662, NBS663, and NBS664), containing between 0.16 and  
 140 0.87 wt% C (**Fig. S3a**). Nitrogen concentrations were determined using the certified standard  
 141 NBS662 ( $^{12}\text{C}^{14}\text{N}/^{12}\text{C} \geq 0.03$ ) and sample B14 (**Fig. S3b**), for which the N content and  $\delta^{15}\text{N}$   
 142 value were independently measured by noble gas static mass spectrometry (see below).  
 143 NBS661, NBS663, and NBS664 were not used for N analyses because the uncertainties on  
 144 their  $^{12}\text{C}^{14}\text{N}/^{12}\text{C}$  ratios were greater than or equal to the measured values, likely due to a  
 145 highly heterogeneous nitrogen distribution in these stainless steel samples. Although only two  
 146 metallic calibrants were used to derive the N content in metals, the calibration is reliable since  
 147 partition coefficients calculated from these values are consistent with literature data (~150  
 148 data points, Fig. 1 in the main text).

149  
 150 **Table S3.**  $^{15}\text{N}/^{14}\text{N}$  ratios (corrected for IMF) determined by SIMS in silicate glasses and metal blobs.

| Sample             | $n_{\text{SIMS}}$<br>silicate | $^{15}\text{N}/^{14}\text{N}^{\text{silicate}}$ | $n_{\text{SIMS}}$<br>metal | $^{15}\text{N}/^{14}\text{N}^{\text{metal}}$ |
|--------------------|-------------------------------|-------------------------------------------------|----------------------------|----------------------------------------------|
| HB01               | 3                             | $0.091 \pm 0.001$                               | 2                          | $0.070 \pm 0.006$                            |
| HB05               | 3                             | $0.685 \pm 0.011$                               | 4                          | $0.652 \pm 0.007$                            |
| HB15               | 3                             | $8.197 \pm 0.140$                               | 3                          | $7.298 \pm 0.364$                            |
| HB3                | 3                             | $0.828 \pm 0.001$                               | 4                          | $0.724 \pm 0.004$                            |
| HB4                | 3                             | $0.864 \pm 0.002$                               | 6                          | $0.790 \pm 0.005$                            |
| A05                | 3                             | $0.672 \pm 0.001$                               | 3                          | $0.656 \pm 0.001$                            |
| Reference material |                               |                                                 |                            |                                              |
| B14*               | –                             | nd                                              | 3                          | $0.003725 \pm 0.000049$                      |

151 \*B14 served as a calibrant for N analyses in metal; its  $^{15}\text{N}/^{14}\text{N}^{\text{silicate}}$  was not determined (nd).

152 The reproducibility on B14 SIMS measurements is 1.3%.

153  $n_{\text{SIMS}}$  indicates the number of SIMS analyses.

154 Reported uncertainties are  $2\sigma$  standard deviations.

155

156 Sample B14 was also analyzed by noble gas mass spectrometry. Thus, we were able to  
 157 directly measure the N isotopic compositions (relative to the atmosphere) of its metal blobs  
 158 ( $\delta^{15}\text{N}^{\text{metal}} = -12 \pm 1\%$ ). Based on these independent isotope ratio measurements of B14, the  
 159 IMF of the ion probe during metal analysis was determined to be  $\alpha_{\text{inst}} = 1.0251 \pm 0.0859$  ( $2\sigma$ ).  
 160 Thus, the measured  $^{15}\text{N}/^{14}\text{N}$  ratios of all the metal phases in the Fe-rich basalt and andesite  
 161 samples were subsequently corrected for IMF according to  $(^{15}\text{N}/^{14}\text{N})_{\text{corr}} = (^{15}\text{N}/^{14}\text{N})_{\text{measured}} /$   
 162  $\alpha_{\text{inst}}$ .

163

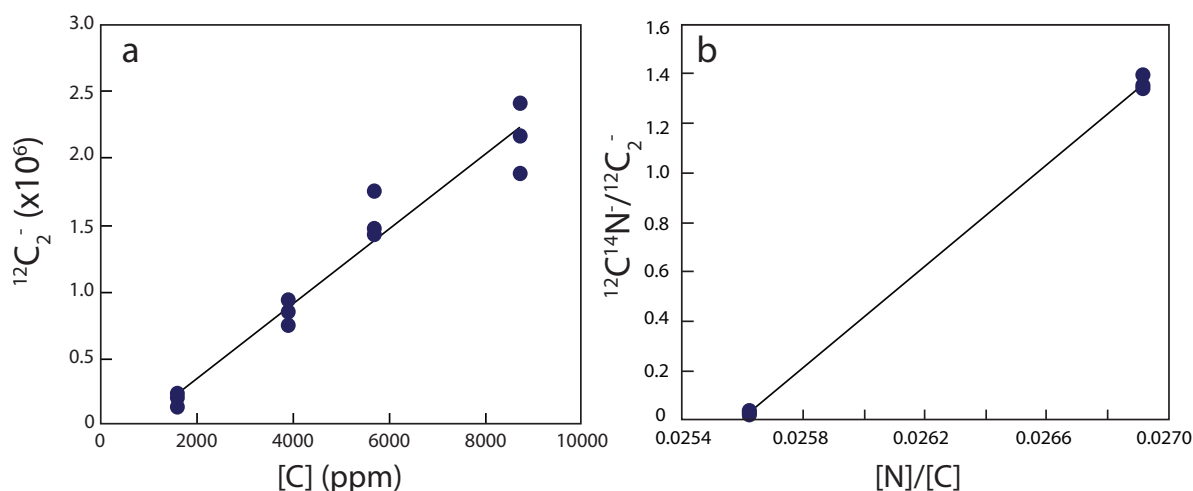

164

165 **Fig. S3.** Calibration lines for C and N abundance analyses in metal alloys. (a) The relationship between  
 166 the secondary ion intensity ratio  $^{12}\text{C}_2^-$  and the known C content of the NBS stainless steel reference  
 167 materials ( $r^2 = 0.95$ ). (b) The relationship between the secondary ion intensity ratio  $^{12}\text{C}^{14}\text{N}^-/^{12}\text{C}_2^-$  and  
 168 the known N/C ratio of NBS662 and sample B14 ( $r^2 = 0.99$ ).

169

170

171 Hydrogen abundances in silicate glasses were measured with the CAMECA 1280 HR2  
 172 ion microprobe. A liquid-nitrogen cold trap was used to reduce the  $\text{H}_2\text{O}$  background and  
 173 maintain a pressure below  $2 \times 10^{-9}$  Torr in the analytical chamber. A 10 kV  $\text{Cs}^+$  primary ion  
 174 beam was used for the analyses. Prior to analysis, a 180-s high-current (1 nA) presputtering  
 175 was rastered over an area of  $20 \mu\text{m} \times 20 \mu\text{m}$  to remove the gold coating and reach the  
 176 sputtering steady state. The samples were then sputtered with a current of 350 pA rastered  
 177 over an area of  $10 \mu\text{m} \times 10 \mu\text{m}$  and a normal-incidence electron gun was used for charge  
 178 compensation. A small field aperture (1000  $\mu\text{m}$ ) and a high magnification (40  $\mu\text{m}$  maximum  
 179 area) were used to restrict the analytical areas to  $5 \mu\text{m} \times 5 \mu\text{m}$  and eliminate hydrogen  
 180 contamination from the crater edges. The  $^{12}\text{C}^-$ ,  $^{16}\text{OH}^-$ , and  $^{29}\text{Si}^-$  ions were collected  
 181 sequentially by changing the magnetic field and counted with a monocollection electron  
 182 multiplier. The mass resolution was set to 7,000 to avoid interferences of  $^{17}\text{O}^-$  on  $^{16}\text{OH}^-$  and  
 183  $^{28}\text{SiH}^-$  on  $^{29}\text{Si}^-$ . The  $\text{H}_2\text{O}$  concentrations of the experimental glasses were determined using  
 184 the calibrated relationship between the secondary ion intensity ratios  $^{16}\text{OH}^-/^{29}\text{Si}^-$  and the  
 185 known  $\text{H}_2\text{O}$  abundances of four glass standards (**Fig. S2b**): KL2-G [0.015 wt%  $\text{H}_2\text{O}$  (7)], VG-  
 186 2 [0.28 wt%  $\text{H}_2\text{O}$  (8)], M48 [0.77 wt%  $\text{H}_2\text{O}$  (9)], and MC84-df [0.707 wt%  $\text{H}_2\text{O}$  (10)].

186

### 187 Noble gas mass spectrometry

188 Nitrogen abundances and isotopic ratios in sample B14 were determined by  $\text{CO}_2$  laser  
 189 extraction static mass spectrometry at the CRPG noble gas analytical facility (11). Samples  
 190 were cleaned in an ultrasonic bath filled with acetone, then weighed and loaded into different  
 191 pits of the laser chamber. Analyses were carried out on a 36- $\mu\text{g}$  metal alloy blob and on a 21-  
 192  $\mu\text{g}$  fragment of silicate glass (free of visible graphite from the capsule or graphite inclusions,  
 193 as observed under the microscope). The samples were heated individually with a continuous-  
 194 mode infrared  $\text{CO}_2$  laser mounted on an  $x$ - $y$  stage. Samples were reheated after melting to  
 195 verify that their N was completely extracted during the first heating step. After gas

196 purification (11), nitrogen isotopic data were collected on a Noblesse HR noble gas mass  
197 spectrometer. The Noblesse HR at CRPG is equipped with three Faraday cups and four ion  
198 counter collectors, thus allowing nitrogen isotopes to be measured in multi-collection mode;  
199 this method provides more precise and reproducible data than those obtained previously in  
200 mono-collection mode on the VG5400 noble gas mass spectrometer by Li et al. (12). The  
201 analytical procedure consisted of first measuring the  $^{12}\text{C}^{16}\text{O}$  signal, followed by the  $^{12}\text{C}^{16}\text{O} +$   
202  $^{14}\text{N}^{14}\text{N}$  and  $^{13}\text{C}^{16}\text{O} + ^{14}\text{N}^{15}\text{N}$  signals using two Faraday cups ( $R = 10^{11} \Omega$ ). After data  
203 acquisition, which consisted of 25 cycles, the  $^{14}\text{N}^{14}\text{N}$  and  $^{15}\text{N}^{14}\text{N}$  intensities were corrected for  
204 the CO contribution. Calibrated air aliquots were used to determine the analytical sensitivity  
205 ( $1.7 \times 10^{-4} \text{ A/Torr}$ ) and the reproducibility of abundance ( $\pm 1.9\%$ ,  $1\sigma$ ) and isotope ratio  
206 measurements ( $\pm 0.06\%$ ,  $1\sigma$ ).

## 207 **2. Relationship between $f\text{O}_2$ , melt structure, and N isotopic fractionation**

208  
209  
210 The precipitation of Fe metal in various proportions, depending on  $f\text{O}_2$ , causes a change in  
211 melt structure (Figs. S4a and S5). As previously noted by Dalou et al. (1) and Armstrong et al.  
212 (2), silicate glasses, for example, become more Si-rich and Fe-poor relative to the starting  
213 compositions owing to oxidation of added  $\text{Si}_3\text{N}_4$  and reduction of FeO in the melt with  
214 decreasing  $f\text{O}_2$ . These changes in the mole fractions of Si and Fe with decreasing  $f\text{O}_2$  result in  
215 an increase in melt polymerization (i.e., a decrease of NBO/T, the ratio of non-bridging  
216 oxygens to tetrahedrally coordinated cations).

217 Melt polymerization does not directly affect N isotopic fractionation. If the increase  
218 in melt polymerization was the dominant control, the N isotopic fractionations in samples  
219 HB3 and A05, which had a similar Fe fraction and NBO/T after the experiment, should have  
220 had similar  $\Delta^{15}\text{N}$  or  $\Delta^{15}\text{N}^*$  values. However, they show distinct  $\Delta^{15}\text{N}$  values of  $-135 \pm 1\%$   
221 and  $-25 \pm 1\%$ , respectively. Similarly, as the melts become more polymerized, their  $\Delta^{15}\text{N}$  or  
222  $\Delta^{15}\text{N}^*$  values should decrease. In both cases, this is not what we observe (Fig. S4b).

223 In the main text, we argue that the dependence of N isotopic fractionation on  $f\text{O}_2$  can  
224 be related to variable NH/N<sub>2</sub> ratios in the glasses. The NH/N<sub>2</sub> ratios in the glasses seem to  
225 depend on the initial degree of melt polymerization (for reasons that remain to be explored)  
226 and on the  $f\text{O}_2$  conditions (Fig. S5).

227

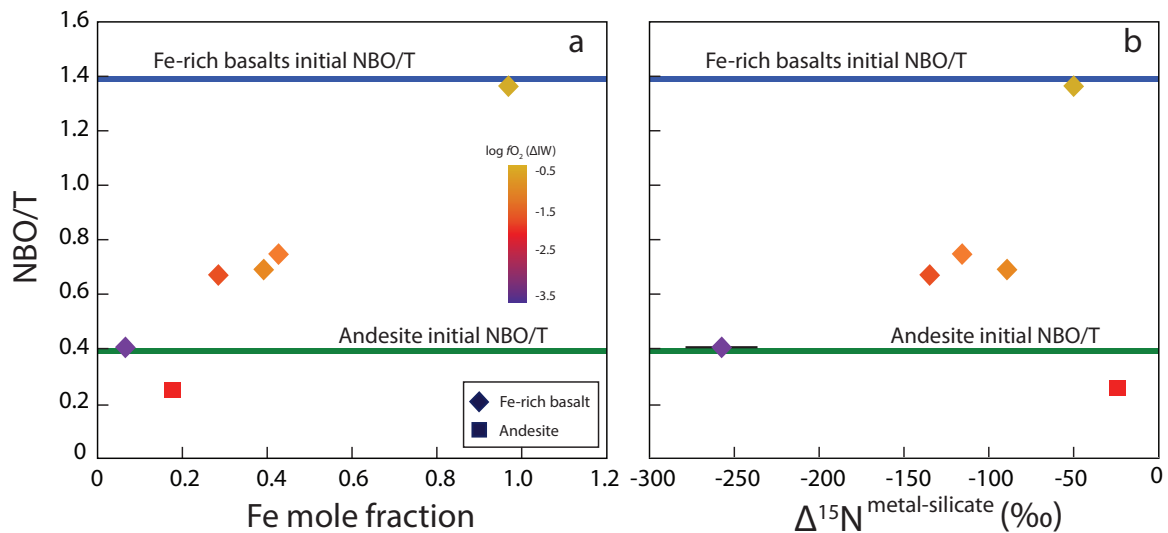

228  
229  
230  
231  
232

**Fig. S4.** NBO/T ratios (lower values being more polymerized) of the glasses as a function of  $fO_2$  (color scale) and (a) Fe mole fraction and (b)  $\Delta^{15}N^{\text{metal-silicate}}$ .

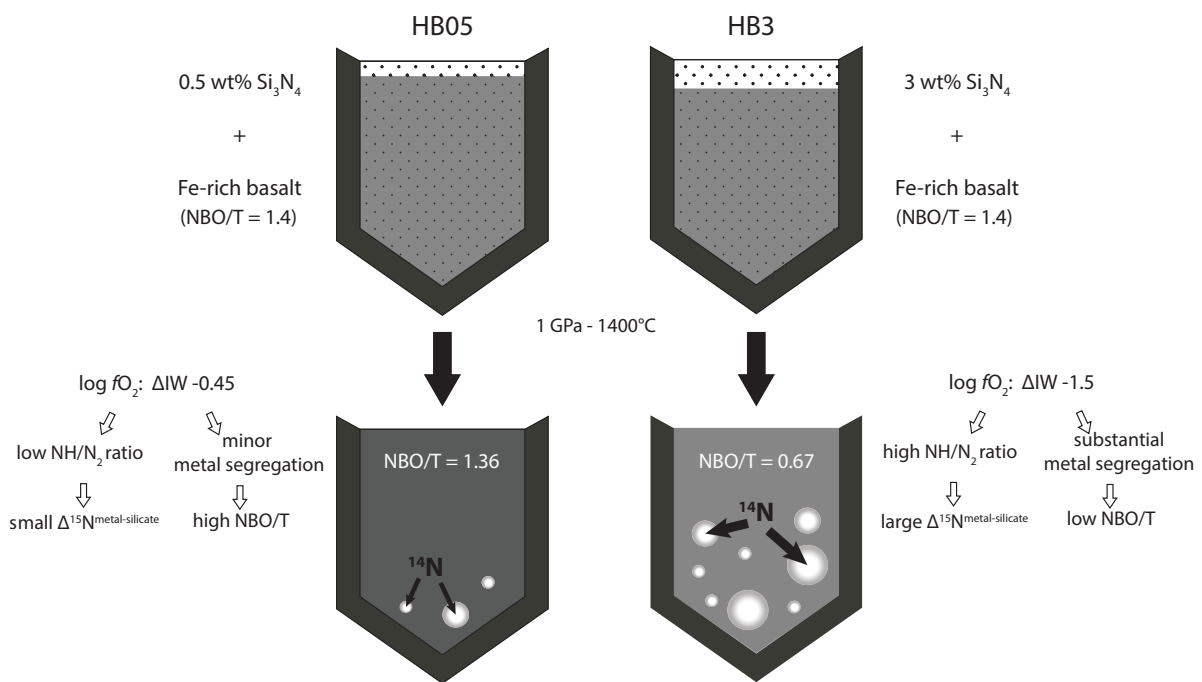

233  
234  
235  
236  
237  
238

**Fig. S5.** Schematic representation of the experimental procedure and the direct and indirect effects of  $fO_2$  on metal segregation, the NBO/T and NH/N<sub>2</sub> ratios of the silicate glasses, as well as on the N isotope fractionation between the metal and silicate phases.

## 239 References

- 240  
241  
242
1. Dalou C, Hirschmann MM, von der Handt A, Mosenfelder J, Armstrong LS (2017) Nitrogen and carbon fractionation during core–mantle differentiation at shallow depth. *Earth and Planetary Science Letters* 458:141-151.



- 243  
244  
245  
246  
247  
248  
249  
250  
251  
252  
253  
254  
255  
256  
257  
258  
259  
260  
261  
262  
263  
264  
265  
266  
267  
268  
269  
270  
271  
272
2. Armstrong LS, Hirschmann MM, Stanley BD, Falksen EG, Jacobsen SD (2015) Speciation and solubility of reduced C–O–H–N volatiles in mafic melt: implications for volcanism, atmospheric evolution, and deep volatile cycles in the terrestrial planets. *Geochimica et Cosmochimica Acta* 171:283-302.
  3. Zhang HL, Hirschmann MM, Cottrell E, Newville M, Lanzirotti A (2016) Structural environment of iron and accurate determination of Fe<sup>3+</sup>/ΣFe ratios in andesitic glasses by XANES and Mössbauer spectroscopy. *Chemical Geology* 428:48-58.
  4. Leonova E, Grins J, Shariatgorji M, Ilag LL, Edén M (2009) Solid-state NMR investigations of Si-29 and N-15 enriched silicon nitride. *Solid state nuclear magnetic resonance*, 36(1), 11-18.
  5. Dubessy J, Caumon M-C, Rull F, Sharma S (2012) Instrumentation in Raman spectroscopy: elementary theory and practice, in: Dubessy, J., Caumon, M.-C., Rull, F. (Eds.), *Raman Spectroscopy Applied to Earth Sciences and Cultural Heritage*, EMU Notes in Mineralogy. The European Mineralogical Union and the Mineralogical Society of Great Britain & Ireland, London, pp. 83–165.
  6. Füre E, Deloule E, Dalou C (2018) Nitrogen abundance and isotope analysis of silicate glasses by secondary ionization mass spectrometry. *Chemical Geology* 493:327–337.
  7. Jochum, K.P. et al. (2006) MPI-DING reference glasses for in situ microanalysis: New reference values for element concentrations and isotope ratios. *Geochemistry, Geophys. Geosystems* 7.
  8. Sobolev AV, Asafov EV, Gurenko AA, Arndt NT, Batanova VG, Portnyagin MV, Garbe-Schönberg D, Krashennnikov SP (2016) Komatiites reveal a hydrous Archaean deep-mantle reservoir. *Nature* 531-628–632.
  9. Shishkina TA, Botcharnikov RE, Holtz F, Almeev RR, Portnyagin MV (2010) Solubility of H<sub>2</sub>O- and CO<sub>2</sub>-bearing fluids in tholeiitic basalts at pressures up to 500MPa. *Chemical Geology* 277:115–125.
  10. Hauri E (2002) SIMS analysis of volatiles in silicate glasses, 2: Isotopes and abundances in Hawaiian melt inclusions. *Chemical Geology* 183:115–141.
  11. Humbert F, Libourel G, France-Lanord C, Zimmermann L, Marty B (2000) CO<sub>2</sub>-laser extraction-static mass spectrometry analysis of ultra-low concentrations of nitrogen in silicates. *Geostandards Newsletter* 24(2):255-260.
  12. Li YF, Marty B, Shcheka S, Zimmermann L, Keppler H (2016) Nitrogen isotope fractionation during terrestrial core-mantle separation. *Geochemical Perspectives* 2
